# Supplementary material for: International wildlife trade quotas are characterized by high compliance and coverage but insufficient adaptive management
Source: PubMed Central journal article supplement (PMC11540902; doi:10.1038/s41559-024-02531-4), 2024-09-09
Supplement: 41559_2024_2531_MOESM1_ESM.pdf [file 41559_2024_2531_MOESM1_ESM.pdf]

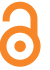

# **International wildlife trade quotas are characterized by high compliance and coverage but insufficient adaptive management**

---

In the format provided by the authors and unedited

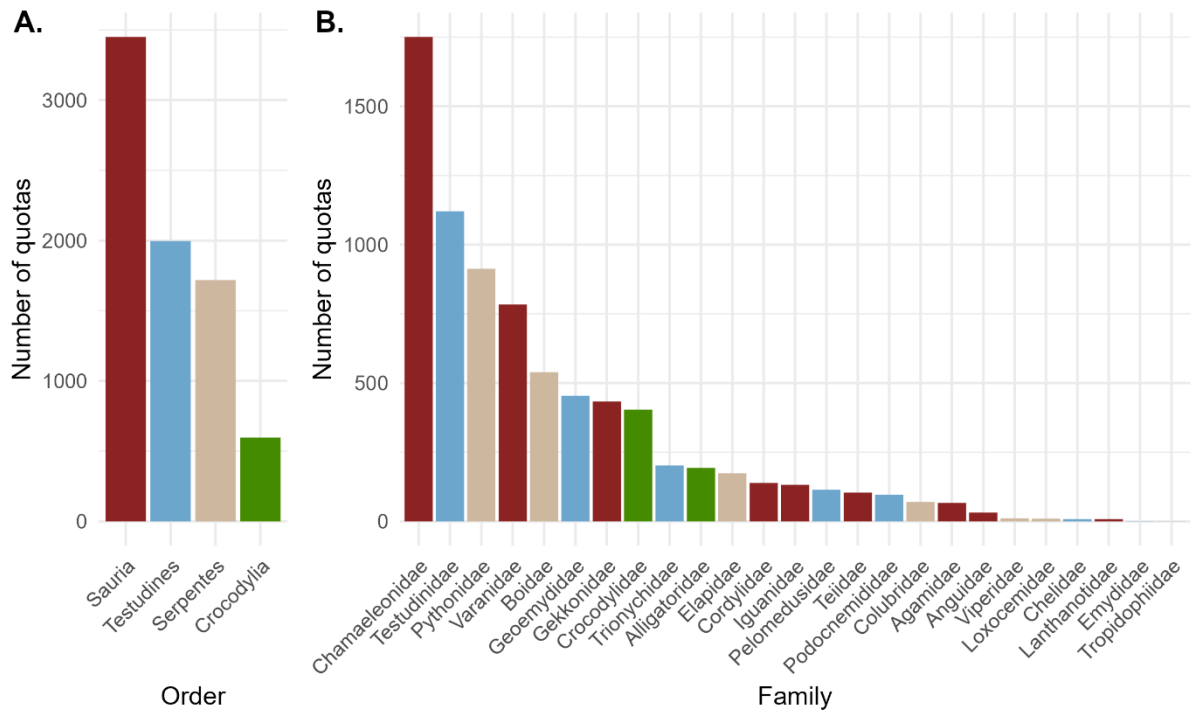

**Supplementary Figure 1. Number of quotas across reptile taxa.** Coloured bars represent the Orders shown in

panel A.

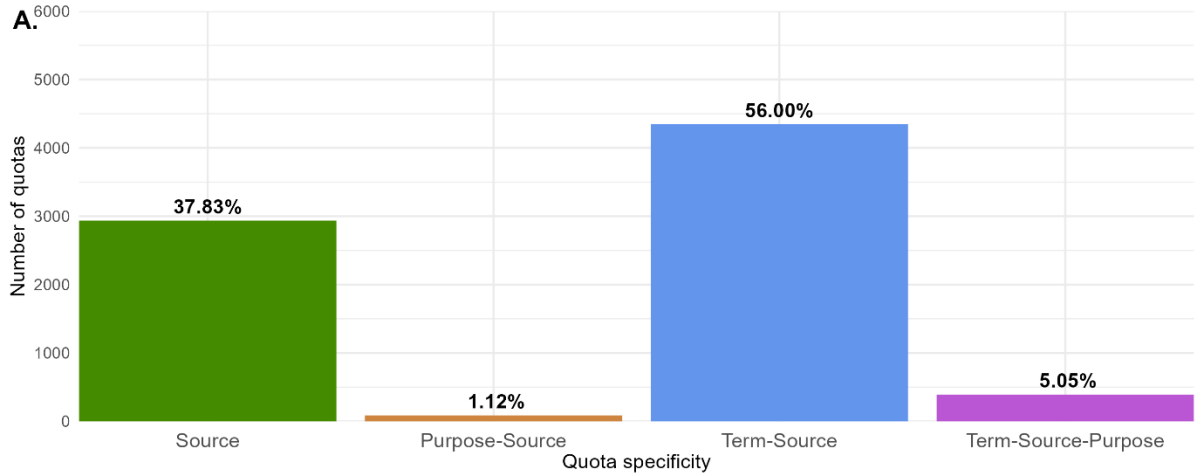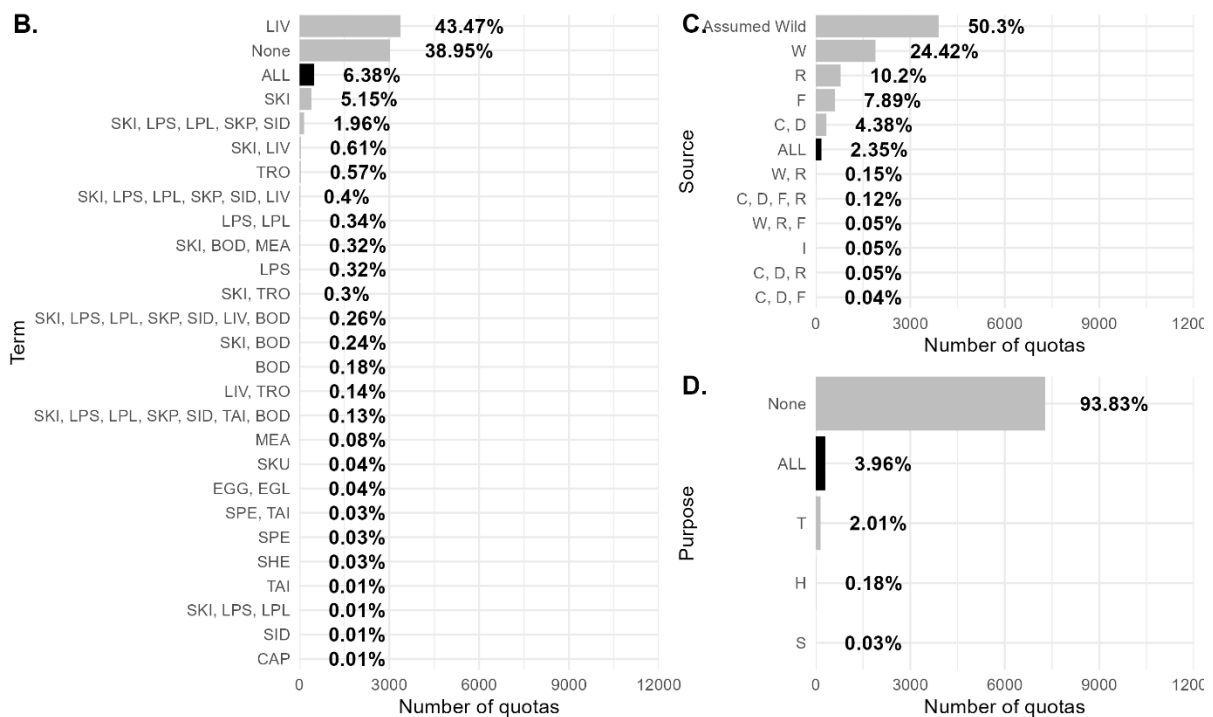

**Supplementary Figure 2. Coverage breakdown for 7761 reptile quotas for the period 1997-2021.** A. Level of detail specified in the quota notes. B. Specific terms specified as covered by the quota. C. Specific sources specified as covered by the quota. D. Specific purposes specified as covered by the quota. In all cases, the percentages denote the proportion of quotas falling into that group. In panels B, C and D the percentage of quotas stated to cover all terms, sources or purposes are shown in black. All term, source and purpose codes follow CITES designations (definitions can be found in Table S1).

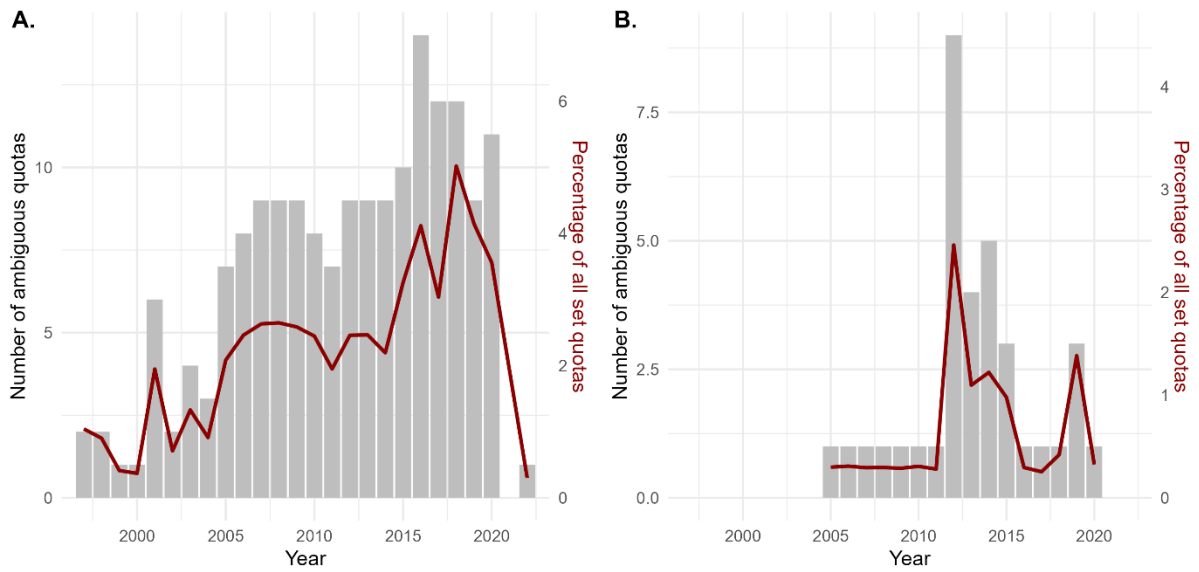

**Supplementary Figure 3. Tally of quotas through time that specify ambiguous terms.** A. Tally of quotas specifying both whole skins and derived skin products in the same quota. B. Tally of quotas specifying both live and derived skin products in the same quota. The grey bars denote the actual number of ambiguous quotas per year and correspond to the left y-axis. The red line denotes this number as a proportion of all reptile quotas set in that year and corresponds to the right y-axis.

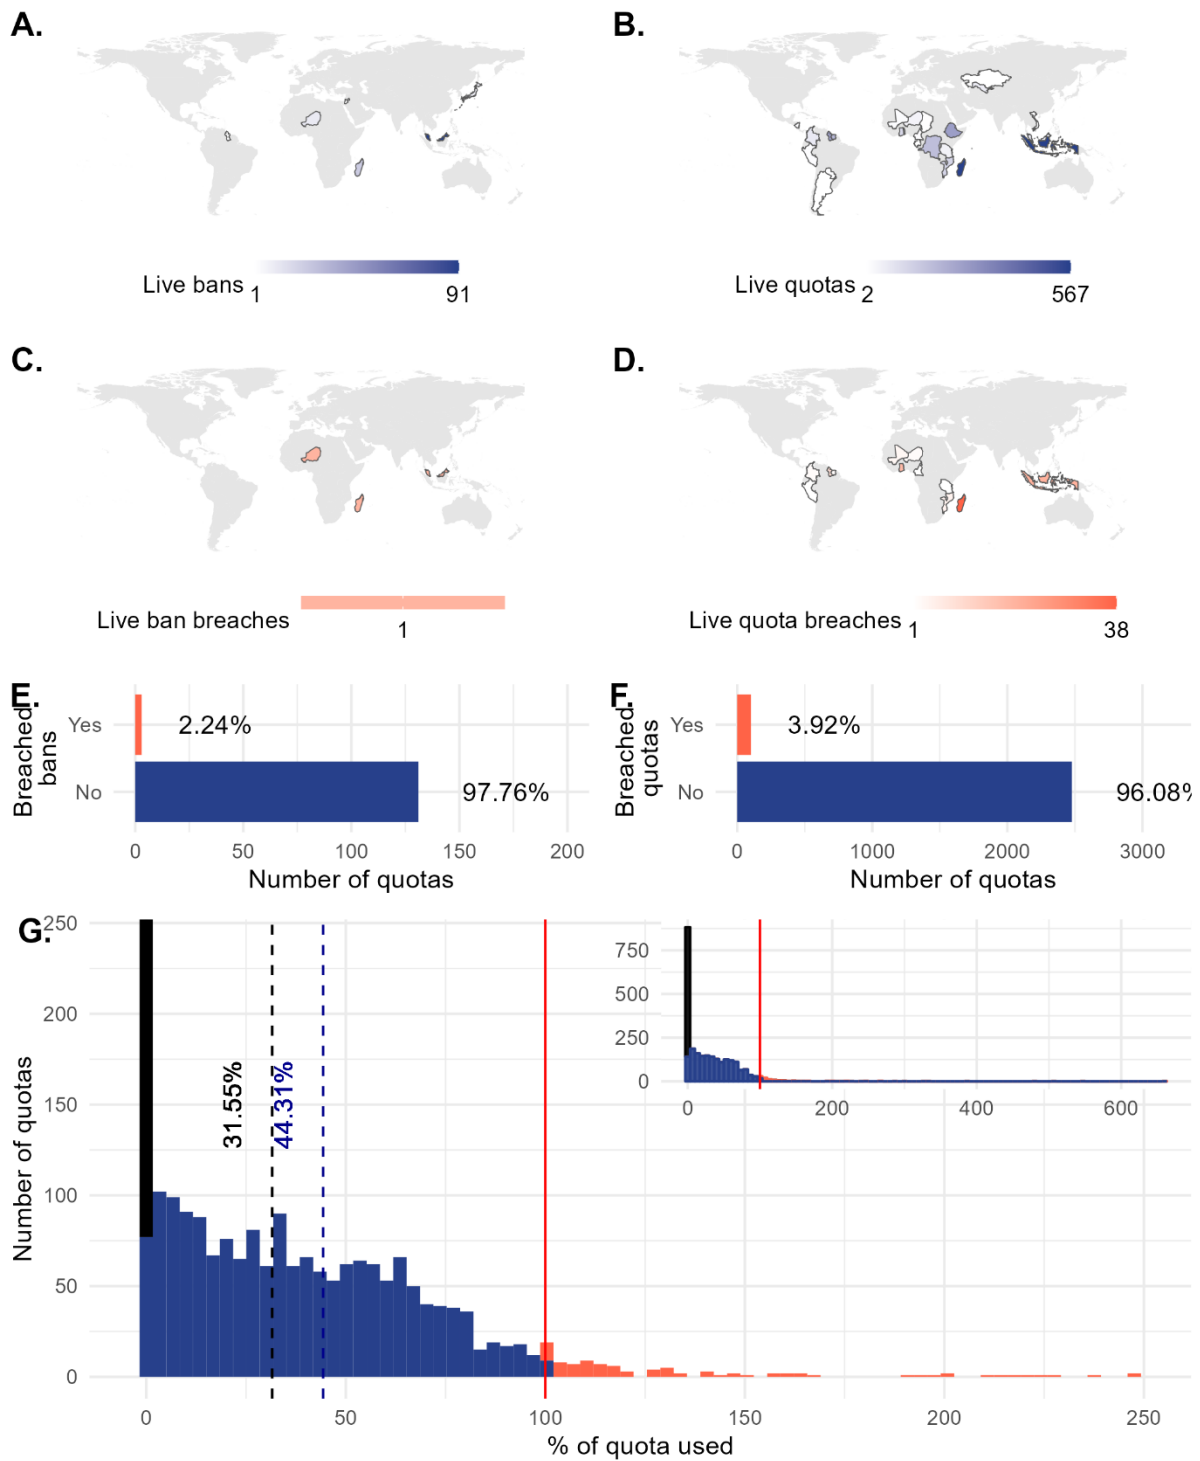

**Supplementary Figure 4. Live reptile quota compliance 1997-2021, using importer reported data.** Counts of total live A. trade bans (zero-quotas) and B. trade quotas. Counts of live C. trade ban breaches and D. quota breaches. Tallies of the total number of adhered to and breached E. bans and F. quotas. G. Percentage of each quota used (0% indicates the species had a quota but was not traded, 100% would indicate exactly the quota amount was traded and percentages above 100% indicate quota breaches). Dashed black line indicates the average percentage of a quota used including species never traded but under quota (e.g. including the 0% values), dashed blue line indicates the average percentage of a quota used for species that have been traded (e.g. excluding the 0% values) and the solid red line indicates 100% quota use. Note – the main panel x-axis

truncated at 250% quota use for clarity and the y-axis at 100 quotas, the full distribution is show in the inset panel. Only 20 quotas had a percentage use over 250%.

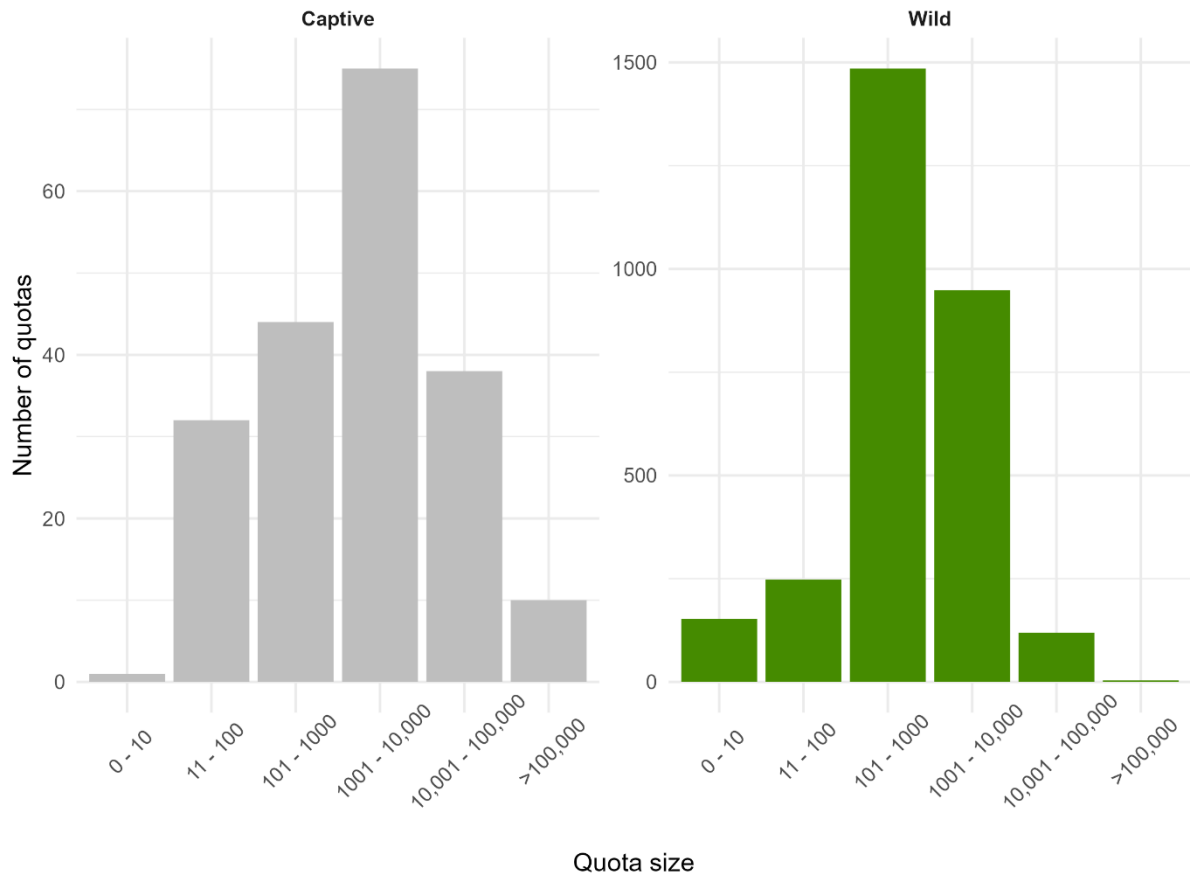

**Supplementary Figure 5. Live quota sizes set for wild and captive specimens.** Wild defined as source codes W (wild taken) and R (taken from the wild and ranched) and captive as codes C (captive bred in accordance with the conventions definitions), D (registered Appendix I listed captive breeding facility) and F (captive born, F1 generation or otherwise not in accordance with the Conventions definition of captive bred).

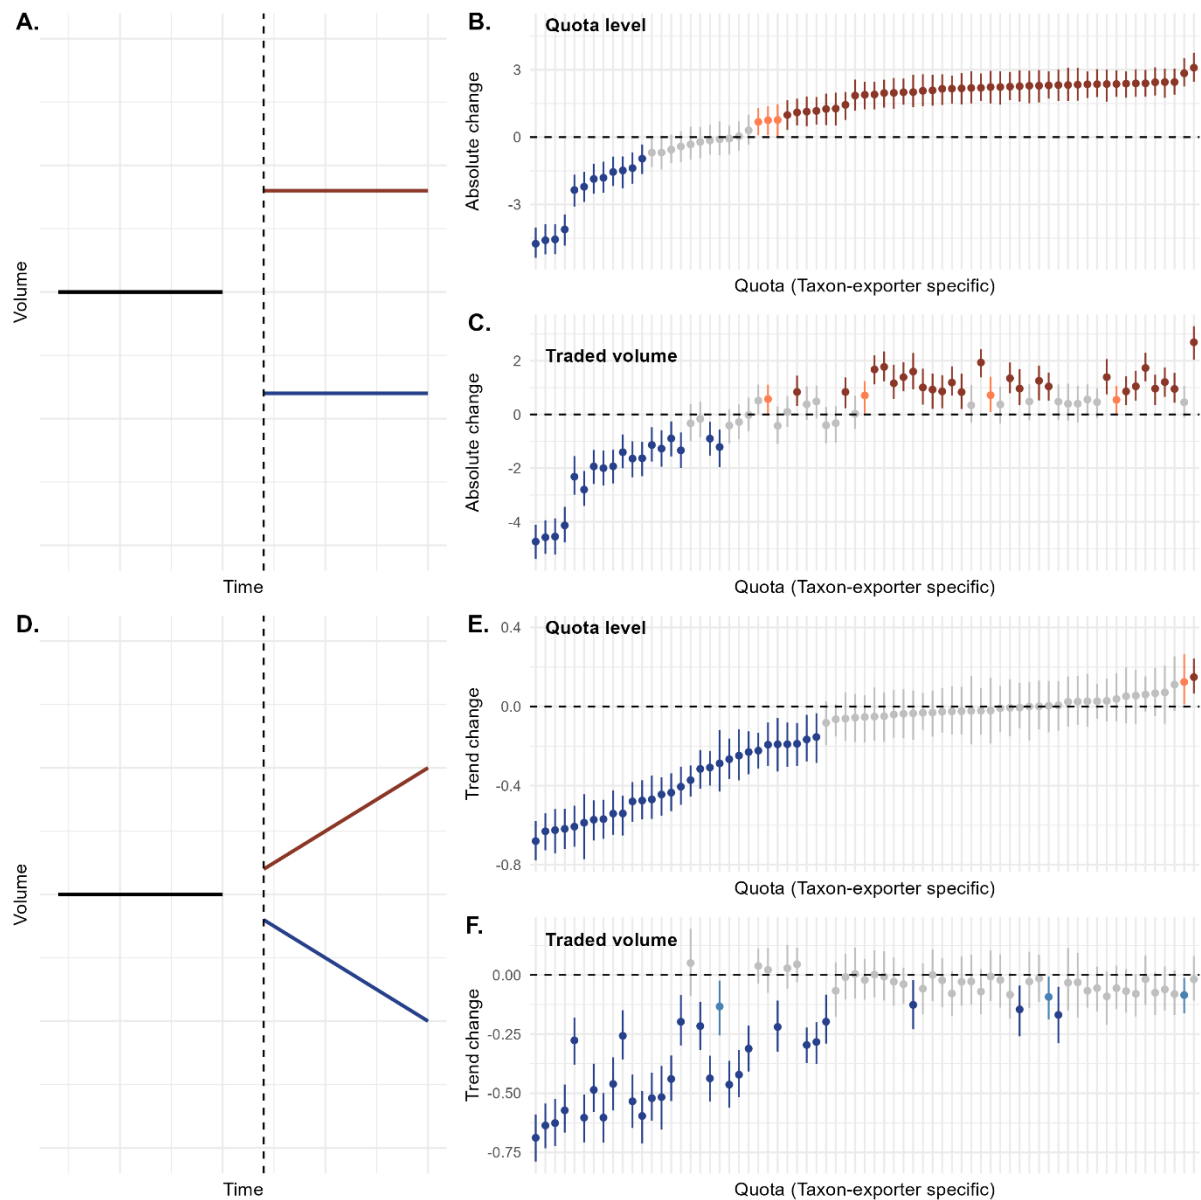

**Supplementary Figure 6. Trade volume coefficients pre- to post-quota setting.** **A.** Conceptual figure for an absolute increase or decrease in quota level or traded volume relative to pre-quota volumes. **B.** Counterfactual coefficients for the quota level relative to volumes the year prior to implementation ( $\beta_2$ ). A one denotes a one SD increase in quota levels relative to pre-quota traded volumes. **C.** As B. but for actual traded volumes ( $\beta_1$ ). **D.** Conceptual figure for an increase or decrease in quota level or traded volume trends through time relative to pre-quota trends. **E.** Counterfactual coefficients for trend changes in quota level relative to volumes the year prior to implementation ( $\beta_5$ ). Minus one denotes a -1 SD decrease in traded volumes per year with a quota relative to without. **F.** As E but for actual traded volumes ( $\beta_4$ ). Colours in C, D, F and G denote the direction and certainty of difference: red (+ve and  $pd > 97.5\%$ ), orange (+ve and  $pd > 95.0\%$ ), grey ( $pd < 95.0\%$ ), pale blue (-ve and  $pd > 95.0\%$ ), and dark blue (-ve and  $pd > 97.5\%$ ). All points are medians and error bars the 90% highest density posterior intervals. Coefficients shown for each of the 69 distinct species-exporter time series, covering 12 Parties and 68 species.



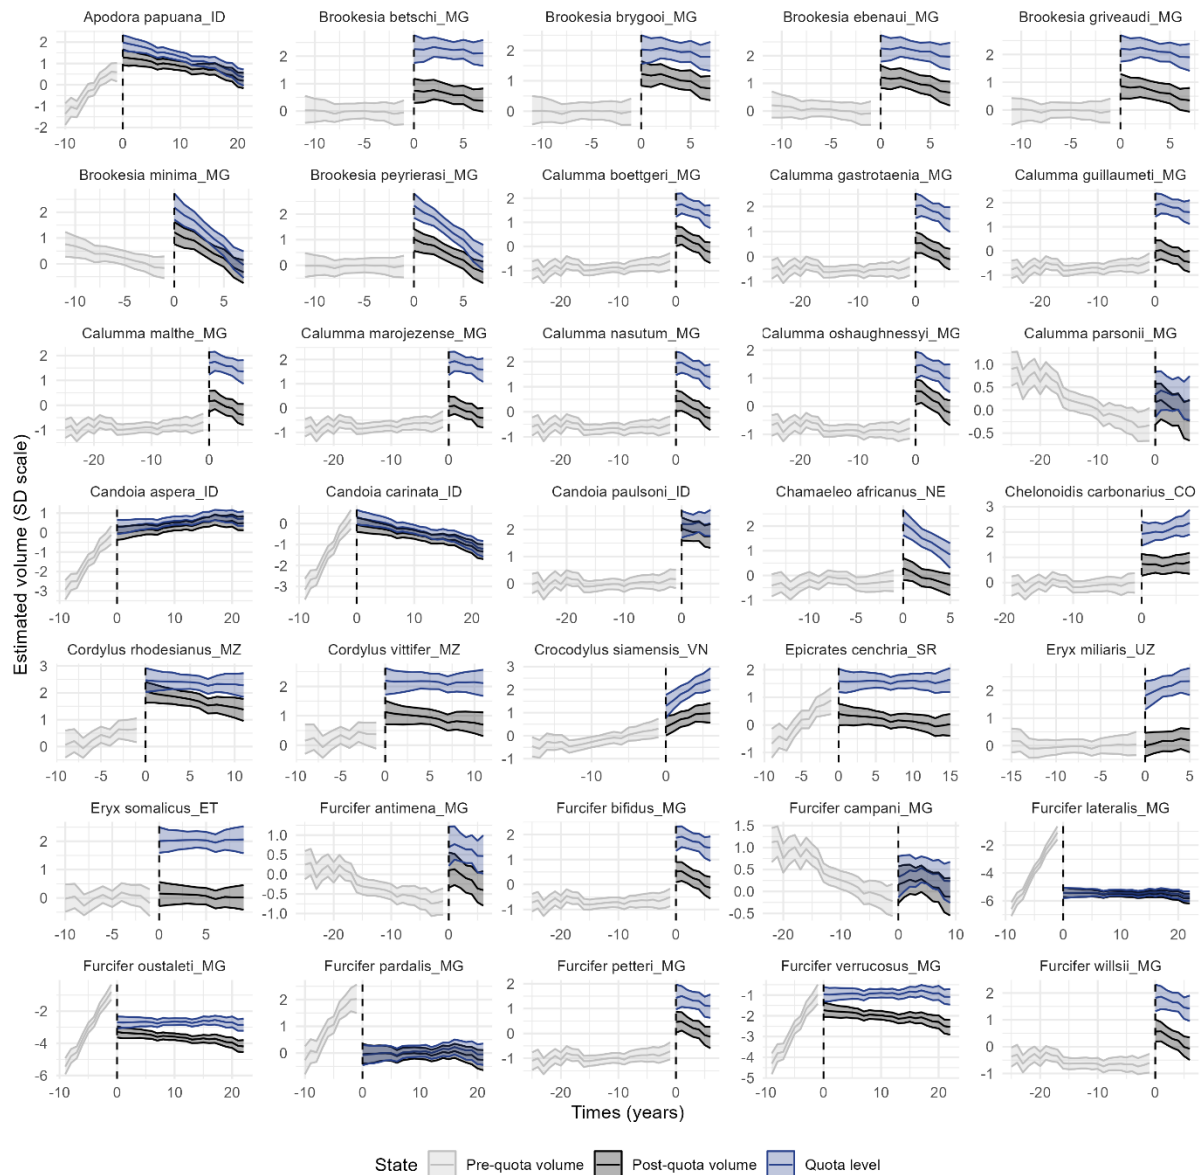

**Supplementary Figure 7. Quota-specific estimates for pre and post-quota trade relative to quota levels (Part 1 – plots split over two figures for clarity).** Plot titles denote the species and Party shown. Colours should pre-quota trade (grey), post-quota trade (volume) and quota levels (blue). The dashed black line at zero shows the point quotas were established. All lines are posterior medians and ribbons are 90% HDI's.

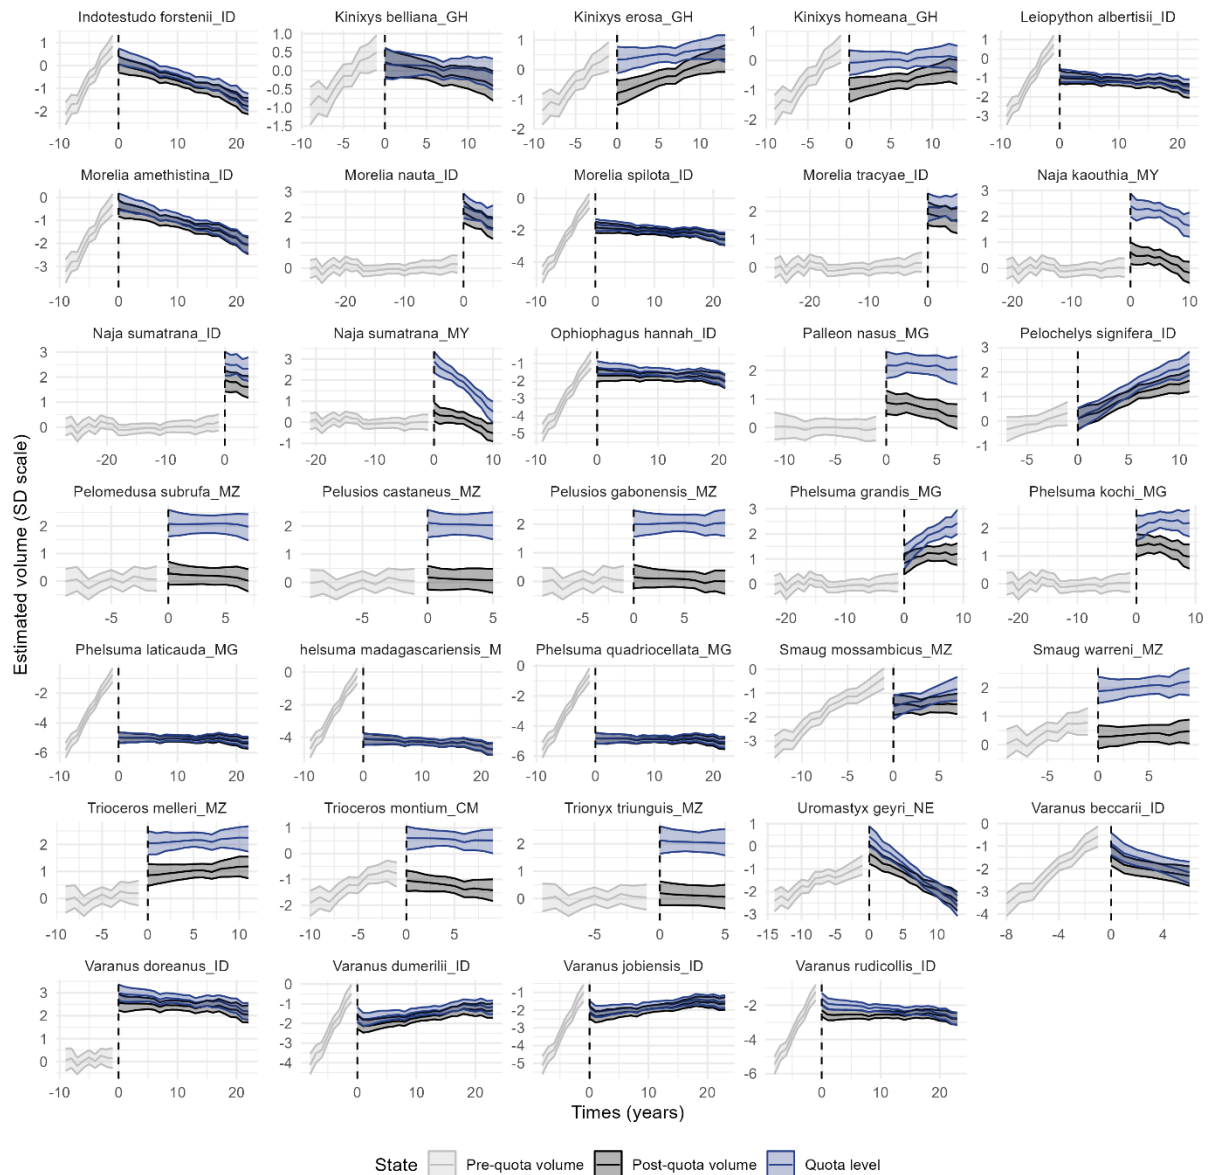

**Supplementary Figure 8. Quota-specific estimates for pre and post-quota trade relative to quota levels (Part 2 – plots split over two figures for clarity).** Plot titles denote the species and Party shown. Colours should pre-quota trade (grey), post-quota trade (volume) and quota levels (blue). The dashed black line at zero shows the point quotas were established. All lines are posterior medians and ribbons are 90% HDI's.

**Supplementary Table 1. CITES summary codes used in Figure S1.**

| <b>Type</b>    | <b>Code</b> | <b>Interpretation</b>                                                                                                                                                                             |
|----------------|-------------|---------------------------------------------------------------------------------------------------------------------------------------------------------------------------------------------------|
| <b>Term</b>    | LIV         | Live                                                                                                                                                                                              |
|                | SKI         | Skin                                                                                                                                                                                              |
|                | LPS         | Leather product (small)                                                                                                                                                                           |
|                | LPL         | Leather product (large)                                                                                                                                                                           |
|                | SKP         | Skin piece                                                                                                                                                                                        |
|                | SID         | Side                                                                                                                                                                                              |
|                | TRO         | Trophy                                                                                                                                                                                            |
|                | BOD         | Body                                                                                                                                                                                              |
|                | MEA         | Meat                                                                                                                                                                                              |
|                | TAI         | Tail                                                                                                                                                                                              |
|                | SKU         | Skull                                                                                                                                                                                             |
|                | SPE         | Specimen (scientific)                                                                                                                                                                             |
|                | SHE         | Shell                                                                                                                                                                                             |
|                | CAP         | Carapace                                                                                                                                                                                          |
|                | EGG         | Egg                                                                                                                                                                                               |
|                | EGL         | Egg (live)                                                                                                                                                                                        |
| <b>Source</b>  | W           | Taken from the wild                                                                                                                                                                               |
|                | R           | Ranched. specimens of animals reared in a controlled environment, taken as eggs or juveniles from the wild, where they would otherwise have had a very low probability of surviving to adulthood. |
|                | F           | Animals born in captivity (F1 or subsequent generations) that do not fulfil the definition of ‘bred in captivity’ in Resolution Conf. 10.16 (Rev.), as well as parts and derivatives thereof.     |
|                | C           | Animals bred in captivity in accordance with Resolution Conf. 10.16 (Rev.), as well as parts and derivatives thereof, exported under the provisions of Article VII, paragraph 5.                  |
|                | D           | Appendix-I animals bred in captivity for commercial purposes in operations included in the Secretariat’s Register, in accordance with Resolution Conf. 12.10 (Rev. CoP15).                        |
|                | I           | Confiscated or seized specimens                                                                                                                                                                   |
| <b>Purpose</b> | T           | Commercial                                                                                                                                                                                        |
|                | H           | Hunting                                                                                                                                                                                           |
|                | S           | Scientific                                                                                                                                                                                        |

**Supplementary Table 2. List of all quotas where trade was reported by the exporter and compliant and reported by the importer and in breach.** Percentages shown are percentages of the set quota reported as traded in that year. Party codes are as follow, NE (Niger), MG (Madagascar), GH (Ghana), CM (Cameroon), MZ (Mozambique), ID (Indonesia), PE (Peru), SR (Suriname), GY (Guyana) and TZ (United Republic of Tanzania).

| <b>Taxon</b>                         | <b>Party</b> | <b>Year</b> | <b>Quota</b> | <b>ER [Volume (%)]</b> | <b>IR [Volume (%)]</b> |
|--------------------------------------|--------------|-------------|--------------|------------------------|------------------------|
| <i>Uromastyx geyri</i>               | NE           | 2008        | 0            | 0 (-)                  | 200 (-)                |
| <i>Brookesia minima</i>              | MG           | 2017        | 0            | 0 (-)                  | 21 (-)                 |
| <i>Python regius</i>                 | GH           | 2009        | 200          | 140 (70%)              | 1320 (660%)            |
| <i>Python regius</i>                 | GH           | 2008        | 200          | 130 (65%)              | 960 (480%)             |
| <i>Python regius</i>                 | GH           | 2011        | 200          | 200 (100%)             | 770 (385%)             |
| <i>Kinixys homeana</i>               | GH           | 2002        | 340          | 119 (35%)              | 1109 (326.2%)          |
| <i>Chamaeleo senegalensis</i>        | GH           | 2002        | 1500         | 1222 (81.5%)           | 3346 (223.1%)          |
| <i>Furcifer lateralis</i>            | MG           | 1999        | 2000         | 1806 (90.3%)           | 4398 (219.9%)          |
| <i>Python regius</i>                 | GH           | 2010        | 200          | 50 (25%)               | 420 (210%)             |
| <i>Kinixys homeana</i>               | GH           | 2001        | 340          | 0 (0%)                 | 683 (200.9%)           |
| <i>Triceros quadricornis</i>         | CM           | 2001        | 400          | 50 (12.5%)             | 789 (197.2%)           |
| <i>Erymnochelys madagascariensis</i> | MG           | 2001        | 25           | 0 (0%)                 | 42 (168%)              |
| <i>Cordylus vittifer</i>             | MZ           | 2002        | 1000         | 1000 (100%)            | 1599 (159.9%)          |
| <i>Cuora amboinensis</i>             | ID           | 2004        | 18000        | 15700 (87.2%)          | 25577 (142.1%)         |
| <i>Amyda cartilaginea</i>            | ID           | 2009        | 25200        | 25200 (100%)           | 35308 (140.1%)         |
| <i>Amyda cartilaginea</i>            | ID           | 2008        | 25200        | 25197 (100%)           | 35230 (139.8%)         |
| <i>Siebenrockiella crassicollis</i>  | ID           | 2004        | 4500         | 3737 (83%)             | 6089 (135.3%)          |
| <i>Amyda cartilaginea</i>            | ID           | 2013        | 25200        | 25200 (100%)           | 33636 (133.5%)         |
| <i>Uroplatus lineatus</i>            | MG           | 2011        | 63           | 41 (65.1%)             | 83 (131.7%)            |
| <i>Iguana iguana</i>                 | PE           | 1997        | 4000         | 3850 (96.2%)           | 5250 (131.2%)          |
| <i>Brookesia stumpffi</i>            | MG           | 2018        | 500          | 494 (98.8%)            | 656 (131.2%)           |
| <i>Python regius</i>                 | GH           | 2002        | 7000         | 6279 (89.7%)           | 9075 (129.6%)          |
| <i>Morelia amethystina</i>           | ID           | 2016        | 135          | 135 (100%)             | 174 (128.9%)           |
| <i>Amyda cartilaginea</i>            | ID           | 2010        | 25200        | 25104 (99.6%)          | 32060 (127.2%)         |
| <i>Kinixys homeana</i>               | GH           | 2003        | 340          | 165 (48.5%)            | 429 (126.2%)           |
| <i>Amyda cartilaginea</i>            | ID           | 2014        | 25200        | 25195 (100%)           | 30327 (120.3%)         |
| <i>Cuora amboinensis</i>             | ID           | 2006        | 18000        | 17694 (98.3%)          | 21482 (119.3%)         |
| <i>Varanus dumerilii</i>             | ID           | 2002        | 400          | 363 (90.8%)            | 476 (119%)             |
| <i>Amyda cartilaginea</i>            | ID           | 2015        | 25200        | 25200 (100%)           | 29882 (118.6%)         |
| <i>Leiopython albertisii</i>         | ID           | 2007        | 450          | 448 (99.6%)            | 521 (115.8%)           |
| <i>Epicrates cenchria</i>            | SR           | 2002        | 169          | 123 (72.8%)            | 195 (115.4%)           |
| <i>Python regius</i>                 | GH           | 2006        | 7000         | 0 (0%)                 | 8075 (115.4%)          |
| <i>Furcifer pardalis</i>             | MG           | 2005        | 2000         | 1855 (92.8%)           | 2304 (115.2%)          |
| <i>Cuora amboinensis</i>             | ID           | 2017        | 18000        | 15800 (87.8%)          | 20534 (114.1%)         |
| <i>Uroplatus ebenauui</i>            | MG           | 2016        | 150          | 124 (82.7%)            | 171 (114%)             |
| <i>Amyda cartilaginea</i>            | ID           | 2011        | 25200        | 24764 (98.3%)          | 28267 (112.2%)         |
| <i>Paleosuchus trigonatus</i>        | GY           | 2018        | 1000         | 994 (99.4%)            | 1120 (112%)            |
| <i>Phelsuma laticauda</i>            | MG           | 2005        | 2000         | 1834 (91.7%)           | 2220 (111%)            |
| <i>Chelonoidis carbonarius</i>       | GY           | 2004        | 704          | 548 (77.8%)            | 776 (110.2%)           |
| <i>Kinixys belliana</i>              | GH           | 2006        | 140          | 0 (0%)                 | 154 (110%)             |
| <i>Epicrates cenchria</i>            | SR           | 2006        | 160          | 157 (98.1%)            | 176 (110%)             |
| <i>Chelonoidis carbonarius</i>       | GY           | 2018        | 704          | 662 (94%)              | 772 (109.7%)           |
| <i>Paleosuchus palpebrosus</i>       | GY           | 2004        | 500          | 381 (76.2%)            | 548 (109.6%)           |

|                                  |    |      |       |               |                |
|----------------------------------|----|------|-------|---------------|----------------|
| <i>Phelsuma laticauda</i>        | MG | 2011 | 2000  | 1802 (90.1%)  | 2188 (109.4%)  |
| <i>Kinixys belliana</i>          | GH | 2008 | 140   | 90 (64.3%)    | 150 (107.1%)   |
| <i>Furcifer lateralis</i>        | MG | 2005 | 2000  | 1753 (87.7%)  | 2138 (106.9%)  |
| <i>Phelsuma quadriocellata</i>   | MG | 2005 | 2000  | 1926 (96.3%)  | 2130 (106.5%)  |
| <i>Stigmochelys pardalis</i>     | TZ | 2005 | 2350  | 2287 (97.3%)  | 2479 (105.5%)  |
| <i>Corallus caninus</i>          | GY | 2001 | 880   | 828 (94.1%)   | 927 (105.3%)   |
| <i>Cuora amboinensis</i>         | ID | 2009 | 18000 | 18000 (100%)  | 18960 (105.3%) |
| <i>Phelsuma madagascariensis</i> | MG | 2005 | 2000  | 1926 (96.3%)  | 2098 (104.9%)  |
| <i>Cordylus rhodesianus</i>      | MZ | 2002 | 1500  | 1020 (68%)    | 1570 (104.7%)  |
| <i>Morelia tracyae</i>           | ID | 2019 | 27    | 26 (96.3%)    | 28 (103.7%)    |
| <i>Phelsuma kochi</i>            | MG | 2016 | 1000  | 953 (95.3%)   | 1026 (102.6%)  |
| <i>Brookesia stumpffi</i>        | MG | 2016 | 500   | 365 (73%)     | 510 (102%)     |
| <i>Heosemys spinosa</i>          | ID | 2017 | 225   | 195 (86.7%)   | 229 (101.8%)   |
| <i>Kinixys erosa</i>             | GH | 2006 | 120   | 0 (0%)        | 122 (101.7%)   |
| <i>Cuora amboinensis</i>         | ID | 2010 | 18000 | 17965 (99.8%) | 18239 (101.3%) |
| <i>Furcifer pardalis</i>         | MG | 2016 | 3000  | 2707 (90.2%)  | 3036 (101.2%)  |
| <i>Amyda cartilaginea</i>        | ID | 2007 | 27000 | 26710 (98.9%) | 27267 (101%)   |
| <i>Furcifer lateralis</i>        | MG | 2011 | 2000  | 1909 (95.4%)  | 2019 (101%)    |
| <i>Furcifer oustaleti</i>        | MG | 2005 | 2000  | 1806 (90.3%)  | 2013 (100.7%)  |
| <i>Furcifer pardalis</i>         | MG | 2011 | 2000  | 1903 (95.2%)  | 2013 (100.7%)  |

---

**Supplementary Table 3. Fixed effect coefficients for the pre- to post-quota trade volume model.**

Fixed effects should be interpreted as the association for the average species from the average exporter. Coefficients are on the standard deviation scale so the  $\beta_1$  coefficient of -0.06 represent a decrease of 0.06 SD's relative to the reference level.

|                                                              | <b>Median</b> | <b>Lower</b> | <b>Upper</b> | <b><i>pd</i> (%)</b> |
|--------------------------------------------------------------|---------------|--------------|--------------|----------------------|
| Intercept<br>( <i>reference level pre-quota trade</i> )      | 0.05          | -0.18        | 0.34         | 62.75                |
| $\beta_1$ Post-quota trade                                   | -0.06         | -0.34        | 0.24         | 61.95                |
| $\beta_2$ Post-quota quota                                   | 0.82          | 0.45         | 1.12         | 100.00               |
| $\beta_3$ Year<br>( <i>reference level pre-quota trade</i> ) | 0.15          | 0.11         | 0.19         | 100.00               |
| $\beta_4$ Year : Post-quota trade                            | -0.19         | -0.23        | -0.15        | 100.00               |
| $\beta_5$ Year : Post-quota quota                            | -0.17         | -0.22        | -0.13        | 100.00               |

**Supplementary Table 4. Change-point model summary of trends pre and post change-point.**

Coefficients are on the identity scale so a pre-change slope of 0.27 denotes a 0.27 increase in the number of updates per additional year of quota length.

|                   | <b>Median</b> | <b>Lower</b> | <b>Upper</b> | <b>Pd (%)</b> |
|-------------------|---------------|--------------|--------------|---------------|
| Pre-change slope  | 0.29          | 0.25         | 0.32         | 100.00        |
| Post-change slope | -0.01         | -0.11        | 0.10         | 56.90         |
| <b>Contrast</b>   | 0.30          | 0.17         | 0.41         | 100.00        |

**Supplementary Table 5. Description of each relationship between pre-quota volumes and post-quota quota levels or post-quota traded volumes.** An increasing or decreasing trend direction is defined as a coefficient with a probability of direction >97.5%. Likewise, an increase or decrease in volume in the year quotas were implemented is where the pre to post contrast has a probability of direction >97.5%.

| Relationship                                                                        | Criteria                                                                                                                                    | Description                                                                                                                                                                      |
|-------------------------------------------------------------------------------------|---------------------------------------------------------------------------------------------------------------------------------------------|----------------------------------------------------------------------------------------------------------------------------------------------------------------------------------|
|    | Pre-quota trend: <b>Uncertain</b><br>Post-quota trend: <b>Uncertain</b><br>Difference in volume at quota implementation: <b>Uncertain</b>   | <b>No relationship.</b> Pre- and post-quota trends are neither increasing nor decreasing and there is no clear difference in absolute amounts.                                   |
|    | Pre-quota trend: <b>Uncertain</b><br>Post-quota trend: <b>Uncertain</b><br>Difference in volume at quota implementation: <b>Increase</b>    | <b>Step increase.</b> Pre- and post-quota trends are neither increasing nor decreasing and there is a clear increase in absolute amounts relative to pre-quota.                  |
|   | Pre-quota trend: <b>Uncertain</b><br>Post-quota trend: <b>Uncertain</b><br>Difference in volume at quota implementation: <b>Decrease</b>    | <b>Step decrease.</b> Pre- and post-quota trends are neither increasing nor decreasing and there is a clear decrease in absolute amounts relative to pre-quota.                  |
|  | Pre-quota trend: <b>Uncertain</b><br>Post-quota trend: <b>Increasing</b><br>Difference in volume at quota implementation: <b>Uncertain</b>  | <b>Increasing from a plateau.</b> Pre-quota trends are neither increasing nor decreasing, post-quota trends are increasing and there is no clear difference in absolute amounts. |
|  | Pre-quota trend: <b>Increasing</b><br>Post-quota trend: <b>Uncertain</b><br>Difference in volume at quota implementation: <b>Uncertain</b>  | <b>Increasing to a plateau.</b> Pre-quota trends are increasing, post-quota trends are neither increasing nor decreasing and there is no clear difference in absolute amounts.   |
|  | Pre-quota trend: <b>Increasing</b><br>Post-quota trend: <b>Decreasing</b><br>Difference in volume at quota implementation: <b>Uncertain</b> | <b>Trend shift.</b> Pre-quota trends are increasing, post-quota trends are decreasing and there is no clear difference in absolute amounts.                                      |
|  | Pre-quota trend: <b>Uncertain</b><br>Post-quota trend: <b>Decreasing</b><br>Difference in volume at quota implementation: <b>Uncertain</b>  | <b>Decreasing from a plateau.</b> Pre-quota trends are neither increasing nor decreasing, post-quota trends are decreasing and there is no clear difference in absolute amounts. |



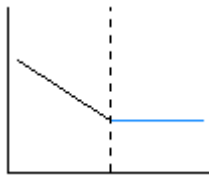

Pre-quota trend: **Decreasing**  
 Post-quota trend: **Uncertain**  
 Difference in volume at quota implementation: **Uncertain**

**Decreasing to a plateau.** Pre-quota trends are decreasing, post-quota trends are neither increasing nor decreasing and there is no clear difference in absolute amounts.

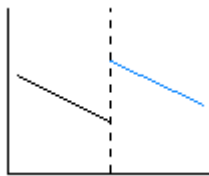

Pre-quota trend: **Decreasing**  
 Post-quota trend: **Decreasing**  
 Difference in volume at quota implementation: **Increase**

**Continuous temporal decrease, step increase.** Pre-quota trends are decreasing, post-quota trends are decreasing and there is an increase in absolute amounts relative to pre-quota.

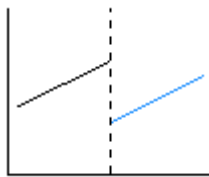

Pre-quota trend: **Increasing**  
 Post-quota trend: **Increasing**  
 Difference in volume at quota implementation: **Decrease**

**Continuous temporal increase, step decrease.** Pre-quota trends are increasing, post-quota trends are increasing and there is a decrease in absolute amounts relative to pre-quota.

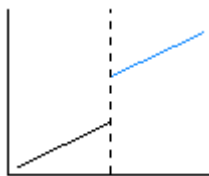

Pre-quota trend: **Increasing**  
 Post-quota trend: **Increasing**  
 Difference in volume at quota implementation: **Increase**

**Continuous temporal increase, step increase.** Pre-quota trends are increasing, post-quota trends are increasing and there is an increase in absolute amounts relative to pre-quota.

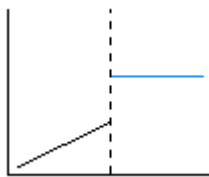

Pre-quota trend: **Increasing**  
 Post-quota trend: **Uncertain**  
 Difference in volume at quota implementation: **Increase**

**Increases to elevated plateau.** Pre-quota trends are increasing, post-quota trends are neither increasing or decreasing and there is an increase in absolute amounts relative to pre-quota.

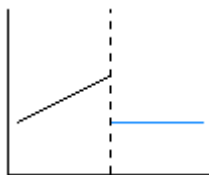

Pre-quota trend: **Increasing**  
 Post-quota trend: **Uncertain**  
 Difference in volume at quota implementation: **Decrease**

**Increases to reduced plateau.** Pre-quota trends are increasing, post-quota trends are neither increasing or decreasing and there is a decrease in absolute amounts relative to pre-quota.

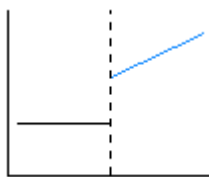

Pre-quota trend: **Uncertain**  
 Post-quota trend: **Increasing**  
 Difference in volume at quota implementation: **Increase**

**Post-quota trend and step increase.** Pre-quota trends are neither increasing or decreasing, post-quota trends are increasing and there is an increase in absolute amounts relative to pre-quota.

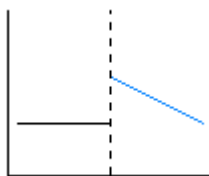

Pre-quota trend: **Uncertain**  
 Post-quota trend: **Decreasing**  
 Difference in volume at quota implementation: **Increase**

**Step increase, subsequent decline.** Pre-quota trends are neither increasing or decreasing, post-quota trends are decreasing and there is an increase in absolute amounts relative to pre-quota.

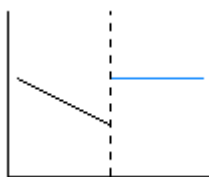

Pre-quota trend: **Decreasing**  
 Post-quota trend: **Uncertain**  
 Difference in volume at quota implementation: **Increase**

**Temporal decrease with elevated plateau.** Pre-quota trends are decreasing, post-quota trends are neither increasing or decreasing and there is an increase in absolute amounts relative to pre-quota.

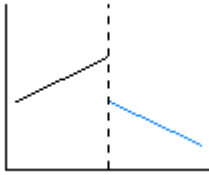

Pre-quota trend: **Increasing**  
 Post-quota trend: **Decreasing**  
 Difference in volume at quota implementation: **Decrease**

**Trend shift, increase to decrease, with step decrease.** Pre-quota trends are increasing, post-quota trends are decreasing and there is a decrease in absolute amounts relative to pre-quota.

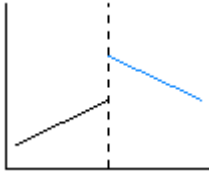

Pre-quota trend: **Increasing**  
 Post-quota trend: **Decreasing**  
 Difference in volume at quota implementation: **Increase**

**Trend shift, increase to decrease, with step increase.** Pre-quota trends are increasing, post-quota trends are decreasing and there is an increase in absolute amounts relative to pre-quota.

**Supplementary Table 6. All species-exporter combinations where the species is assessed as likely threatened by the international wildlife trade reported as traded after 2015.** The IUCN assessments shown correspond to the species status in the year it was traded, not necessarily their current status.

| <b>Taxon</b>                          | <b>Exporter</b> | <b>Year</b> | <b>Volume</b> | <b>IUCN Assessment</b> |
|---------------------------------------|-----------------|-------------|---------------|------------------------|
| <i>Carettochelys insculpta</i>        | ID              | 2018        | 5240          | EN                     |
| <i>Cyclanorbis senegalensis</i>       | CD              | 2019        | 15            | VU                     |
| <i>Cyclanorbis senegalensis</i>       | GH              | 2018        | 86            | VU                     |
| <i>Cyclanorbis senegalensis</i>       | GH              | 2021        | 235           | VU                     |
| <i>Cyclanorbis senegalensis</i>       | TG              | 2017        | 83            | VU                     |
| <i>Cyclanorbis senegalensis</i>       | TG              | 2018        | 9             | VU                     |
| <i>Cycloderma aubryi</i>              | CD              | 2017        | 50            | VU                     |
| <i>Graptemys pearlensis</i>           | US              | 2018        | 6             | EN                     |
| <i>Kinixys homeana</i>                | GH              | 2019        | 205           | VU                     |
| <i>Macrochelys temminckii</i>         | US              | 2016        | 43718         | VU                     |
| <i>Macrochelys temminckii</i>         | US              | 2017        | 35889         | VU                     |
| <i>Macrochelys temminckii</i>         | US              | 2018        | 36672         | VU                     |
| <i>Macrochelys temminckii</i>         | US              | 2019        | 29801         | VU                     |
| <i>Malaclemys terrapin</i>            | US              | 2017        | 72            | NT                     |
| <i>Ophiophagus hannah</i>             | ID              | 2021        | 174           | VU                     |
| <i>Ophiophagus hannah</i>             | MY              | 2016        | 10            | VU                     |
| <i>Ophiophagus hannah</i>             | MY              | 2017        | 16            | VU                     |
| <i>Ophiophagus hannah</i>             | MY              | 2018        | 2             | VU                     |
| <i>Ophiophagus hannah</i>             | MY              | 2019        | 1             | VU                     |
| <i>Ophiophagus hannah</i>             | MY              | 2020        | 2             | VU                     |
| <i>Siebenrockiella crassicollis</i> * | ID              | 2019        | 2349          | VU                     |
| <i>Trioceros serratus</i>             | CM              | 2019        | 10            | VU                     |
| <i>Trioceros serratus</i>             | CM              | 2020        | 78            | VU                     |
| <i>Trioceros serratus</i>             | CM              | 2021        | 260           | VU                     |
| <i>Uromastyx aegyptia</i>             | SD              | 2018        | 485           | VU                     |

\* *Siebenrockiella crassicollis* is quota managed annually by Indonesia 2003-2023, except in 2019 this may indicate the species was still managed in 2019 but the quota was just not submitted/published.
